# Supplementary material for: Divergent effects of short-term and continuous anthropogenic noise exposure on Western Bluebird parental care behavior
Source: PubMed Central journal article supplement (PMC11606327; doi:10.7717/peerj.18558), 2024-11-26

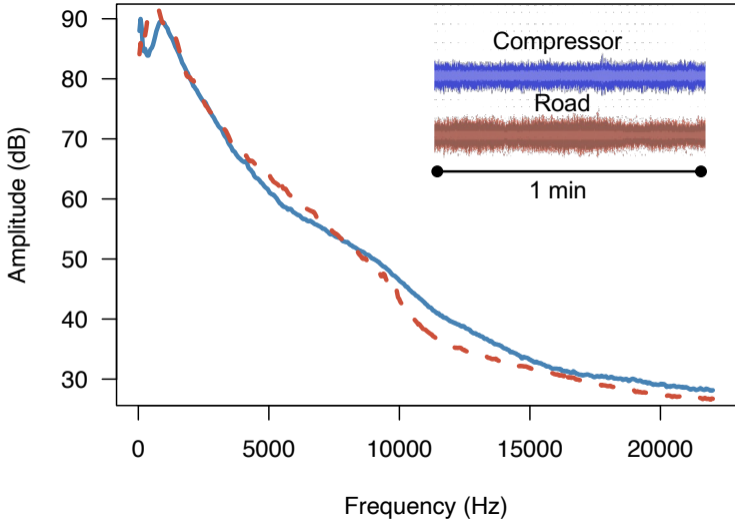

Supplement: peerj-12-18558-s002.pdf [file peerj-12-18558-s002.pdf]
